1 Title: Population structure and dispersal across small and large spatial scales in a direct  
2 developing marine isopod

3 Authors: William S. Pearman<sup>a\*</sup>, Sarah J. Wells<sup>b</sup>, Olin K. Silander<sup>a</sup>, Nikki E. Freed<sup>a</sup>, and  
4 James Dale<sup>a</sup>

5  
6 <sup>a</sup> School of Natural and Computational Sciences, Massey University, Auckland 0745, New  
7 Zealand

8 <sup>b</sup> School of Environmental and Animal Sciences, Unitec, Auckland 1025, New Zealand

9

10 \*Corresponding author: [wpearman1996@gmail.com](mailto:wpearman1996@gmail.com)

11 **Abstract**

12 Marine organisms generally develop in one of two ways: biphasic, with distinct adult and  
13 larval morphology, and direct development, in which larvae look like adults. The mode of  
14 development is thought to significantly influence dispersal, with direct developers having  
15 much lower dispersal potential. While dispersal and population connectivity is relatively well  
16 understood for biphasic species, comparatively little is known about direct developers. In this  
17 study, we use a panel of 8,020 SNPs to investigate population structure and gene flow for a  
18 direct developing species, the New Zealand endemic marine isopod *Isocladus armatus*. We  
19 find evidence that on a small spatial scale (20 kms), gene flow between locations is  
20 extremely high and suggestive of an island model of migration. However, over larger spatial  
21 scales (600km), populations exhibit a strong pattern of isolation-by-distance. The  
22 intersection of our sampling range by two well-known biogeographic barriers (the East Cape  
23 and the Cook Strait) provides an opportunity to understand how such barriers influence  
24 dispersal in direct developers. We find that *I. armatus* has high migration rates across these  
25 barriers. However, we find evidence of a north-south population genetic break occurring  
26 between Māhia and Wellington, although there are no obvious biogeographic barriers  
27 between these locations. This study suggests that biogeographic barriers may affect  
28 migration in direct development species in unexpected ways.

## 29 **Introduction**

### 30 **Life history influences genetic population structure**

31 A species' developmental life history has a significant effect on population connectivity and  
32 dispersal. For marine organisms, developmental life histories are generally classified in one  
33 of two ways: direct developers, in which larvae resemble adults and do not disperse large  
34 distances; and biphasic, in which larvae have different morphologies from adults and  
35 generally disperse large distances via ocean currents (Cowen & Sponaugle, 2009; Puritz et  
36 al., 2017; Simpson et al., 2014) during a pelagic larval stage. For this reason, direct-  
37 developing species tend to show greater population structure than biphasic species (Ayre et  
38 al., 2009; McMillan et al., 1992; Pelc et al., 2009; Waples, 1987). However, some species do  
39 not conform to this expected pattern (Ayre et al., 2009; Puritz et al., 2017; Shanks, 2009;  
40 Winston, 2012).

41 Dispersal (and thus population structure) is also affected by biogeographic barriers, and the  
42 effects of these barriers themselves depend on the life history of the organism. For example,  
43 off shore ocean currents may have large effects on biphasic species, but little effect on direct  
44 developers. Similarly, we would expect that direct developers with limited dispersal potential  
45 will be doubly limited if there is no suitable habitat within the range of their average dispersal  
46 distance. However, in some cases the lack of nearby suitable habitat does not obviously limit  
47 dispersal in direct developers, and but does appear to limits the dispersal of biphasic species  
48 (Ayre et al., 2009). This is contrary to predictions based on the expected relationship  
49 between life history and dispersal potential. These cases, where direct developers exhibit  
50 greater dispersal than otherwise predicted, are not uncommon within intertidal organisms  
51 (Ayre et al., 2009; González-Wevar et al., 2018; Wells & Dale, 2018; Yoshino et al., 2018),  
52 suggesting that population connectivity cannot be entirely predicted by life history or even  
53 the knowledge of biogeographic barriers. As a result, it is important to more carefully quantify  
54 population structure in direct developing marine species across a range of spatial scales and  
55 biogeographic contexts. This will help to clarify the complex relationships between life  
56 history, biogeography, and population structure.

### 57 **Population Genetics in *Isopoda***

58 Marine isopods offer a highly tractable and attractive system for investigating the dispersal  
59 potential and population structure of direct-developing species. Many isopod species occur  
60 in large numbers in the easily sampled intertidal zone across extensive geographic ranges.  
61 However, the forces acting to maintain population genetic structure in marine isopods are  
62 not well understood. Some species exhibit genetic structure over small spatial scales, on the  
63 order of tens of kilometres. This is congruent with the hypothesis of reduced dispersal in

64 direct developers, and may be responsible for the widespread occurrence of multiple cryptic  
65 species of isopods (*Ligia* and *Tylos spp.*) on the Southern California coastline and in Baja  
66 (Markow & Pfeiler, 2010; Hurtado et al, 2010; Hurtado et al, 2013).

67 In contrast, other species of isopods exhibit transoceanic distributions, indicative of  
68 historically high dispersal rates. One example is *Sphaeroma terebrans*, which is distributed  
69 across both the Atlantic and Indian Oceans. The apparently high dispersal rate and wide  
70 distribution of this wood-boring isopod may be result of its reliance on “rafting” for dispersal  
71 (a process in which individuals use large rafts of algae or other floating debris to disperse)  
72 (Baratti et al., 2011). The contrast between *Sphaeromona* and *Ligia* and *Tylos spp.* suggests  
73 that for isopods, life history (i.e. whether species are direct developers or not) may not  
74 always be a good predictor of population structure, and that behavioural aspects should also  
75 be considered.

76 Here we investigate the New Zealand-wide population genetic structure of the intertidal  
77 isopod *Isocladus armatus*. Endemic to New Zealand, this highly colour polymorphic species  
78 is found in abundance on semi-sheltered rocky shorelines throughout the country. There is  
79 evidence that this direct-developing isopod species can exhibit high dispersal rates (Wells &  
80 Dale, 2018). In this case, the authors found no significant population divergence between  
81 two sites separated by 11km of coastline. This is indicative of a highly mobile species. On a  
82 much larger scale (1,000 kms), however, population structure was evident. It is unclear at  
83 precisely what spatial scale this population genetic structure begins to break down, or  
84 whether biogeographic barriers affect this.

85 To investigate this, we use genotyping-by-sequencing (GBS) to resolve population structure  
86 over a range of spatial scales. By quantifying population genetic structure in this species, we  
87 are able to identify the role of geography (both distance and seascape features) in  
88 influencing gene flow and dispersal. We find, unexpectedly, that well-known biogeographic  
89 barriers, the Cook Strait and the East Cape, have little effect on dispersal. However, there is  
90 strong evidence of a north-south break in populations structure, suggesting that unidentified  
91 biogeographic barriers prevent migration between these regions.

92

## 93 **Methods**

### 94 **Sample Collection**

95 We collected specimens of *Isocladus armatus* in June, 2018, from around the North Island,  
96 New Zealand, from locations where *I. armatus* has previously been recorded (Hurley &  
97 Jansen, 1977; *INaturalist.org*, n.d.). These sites were at Stanmore Bay, Browns Bay, Opito

98 Bay (Coromandel), Mt Maunganui, Māhia Peninsula, and Wellington (Fig. 1). At each site we  
99 collected a minimum of 32 individuals, up to a maximum of 48, and attempted to sample  
100 individuals as equally as possible amongst colour morph and sex. Where possible, we  
101 collected specimens larger than 5mm in order to ensure sufficient DNA could be extracted  
102 for sequencing (see supplementary methods for details). The maximum distance between  
103 individuals collected at any site did not exceed 30 m. Samples were stored at -80°C in 100%  
104 ethanol until extraction. We have included samples from Wells and Dale 2018 (see [ref] for  
105 sampling methods) to increase the number of sampled individuals and the range of location.  
106 In addition, the temporal structure of this sampling may yield insight into the short term  
107 changes in allele frequencies within a population.

#### 108 **DNA Extraction**

109 We extracted DNA following a modified Qiagen DNEasy Blood and Tissue protocol from  
110 Wells and Dale (2018). Briefly, we used 178 µl of 0.5M EDTA and 22 µl of 20% SDS in each  
111 extraction (rather than varying volumes by weight of tissue). Additionally, we eluted DNA  
112 from the spin column three times, using 50 µl of nuclease-free water for each. We let the  
113 eluent sit on the column for 15 minutes before centrifugation for one minute at 7,000 rcf.

#### 114 **Data Collection and Processing**

115 DNA samples were processed by Diversity Arrays Technology (DArT) Ltd (Canberra,  
116 Australia) using a genotyping-by-sequencing (GBS) approach. The methodology behind this,  
117 including restriction enzyme choice are described in detail in Wells and Dale (2018). DArT  
118 performs SNP calling using a proprietary pipeline. SNPs are only called if both homozygous  
119 and heterozygous genotypes can be identified.

120 We analysed the dataset provided by diversityArrays together with the data from Wells and  
121 Dale (2018). To ensure the datasets were compatible, we filtered each dataset separately  
122 based on the conditions described below using the R packages dartR (Gruber et al., 2018)  
123 and radiator (Gosselin, 2019). We then used only the loci shared across both datasets for  
124 the remainder of the analyses.

125 We required SNPs have a minimum call rate  $\geq 0.9$ , a minor allele count of at least 3,  
126 observed heterozygosity  $> 0.5$ , minimum depth of  $> 5X$  and maximum depth of  $50X$ . If we  
127 found multiple SNPs on the same read, then we removed the SNP with lowest replicability  
128 (based on the number of technical replicates that resulted in the same allele being called).  
129 Finally, where appropriate for further analysis, we removed SNPs outside of Hardy-Weinberg  
130 Equilibrium or that we inferred as being under selection. Specific details of why these filters  
131 were implemented and how are outlined in the supplementary methods. One individual was

132 excluded from all analyses (BBFA3), as this sample had a very high number of SNPs  
133 missing across all loci (93%).

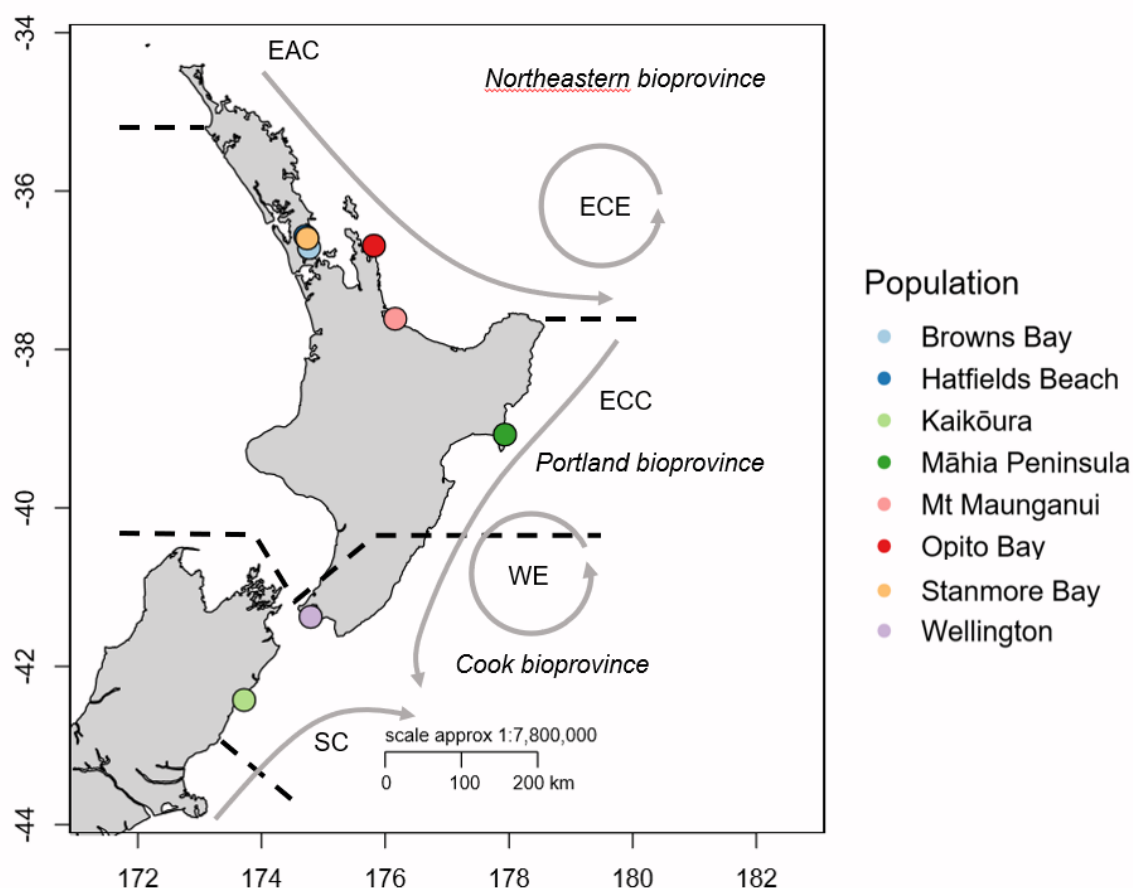

134

135 **Figure 1. Map of sampling localities within New Zealand (coloured dots).** The prevailing ocean  
136 currents and biogeographic breaks proposed by Shears et al (2008) are also indicated. Black dashed  
137 lines and unabbreviated labels indicate bioprovinces. Grey arrows indicate currents, abbreviated as:  
138 EAC (East Auckland Current), ECE (East Cape Eddy), ECC (East Cape Current), WE (Wairarapa  
139 Eddy), and SC (Southland Current).

140

## 141 Data Analysis

142 We calculated F-statistics using StAMPP (Pembleton et al., 2013). We used  $F_{st}$  as the  
143 primary measure of genetic differentiation because  $F_{st}$  remains relatively robust for biallelic  
144 markers such as SNPs (Whitlock, 2011).

145 We conducted principal component analyses (PCA) using the R package adegenet (Jombart  
146 & Ahmed, 2011). In order to understand the correspondence between the principal  
147 components and geography, we performed a Procrustes transformation of the first two  
148 principal components using MCMCpack in R (Martin et al., 2011). Procrustes  
149 transformations scale, stretch, and rotate the PCA in order to minimize the differences

150 between two matrices (in this case, the difference between principal components and  
151 geographic coordinates).

152 We implemented STRUCTURE analyses using STRUCTURE 2.3.4 (Falush et al., 2003) and  
153 performed with all populations (including the repeated samples of Stanmore Bay). For these  
154 analyses, we assumed an admixture model. We ran the Markov Chain Monte Carlo  
155 simulations with 100,000 iterations and a burn-in of 50,000. We conducted ten replicates of  
156 each run, and varied  $K$  from 2 through 9. We performed final population inference by  
157 consolidating the results for each level of  $K$ , in CLUMPP (Jakobsson & Rosenberg, 2007).  
158 Additionally, we performed a separate STRUCTURE analysis on the Auckland populations  
159 with the implementation of the locprior model at a  $K$  of 3, in order to test for fine-grain  
160 population structure within Auckland. Due to concerns regarding the inferences made when  
161 defining  $K$ , we chose to present a range of realistic values for  $K$  (Pritchard et al., 2010; Verity  
162 & Nichols, 2016).

163 We tested for Isolation-by-Distance by conducting a Mantel test using the R package vegan  
164 (Oksanen et al., 2010). We used Slatkin's linearized  $F_{st}$  matrix (transformed using  $1/1-F_{st}$   
165 (Rousset, 1997)) and an overwater distance matrix for this test. We calculated overwater  
166 distance using the marmap (Pante & Simon-Bouhet, 2013) and fossil (Vavrek, 2011) R  
167 packages, finding the minimum distance between populations around the coast within a  
168 depth range of 150 m.

169

## 170 **Results**

171 To examine population structure in *I. armatus* populations, we isolated 261 individuals  
172 distributed across 8 populations across New Zealand (**Fig. 1**). We obtained DaRT SNP data  
173 for these 261 individuals, which identified 78,927 SNP loci as being polymorphic. After  
174 stringent filtering (see **Methods** and **Supp. Methods**), 8,020 SNPs remained  
175 (**Supplementary Table 2**).

176 We first used this filtered SNP data to test for population structure using  $F$  statistics (see  
177 **Methods**). We found evidence for structure (likely due to decreased rates of genetic  
178 exchange) only between populations at least 19 km apart (Browns Bay and Stanmore Bay),  
179 with  $F_{st}$  values ranging from 0.06 to 0.25 (**Table 1**).

180 **Table 1. Population  $F_{st}$  values.** There is evidence of weak population structure within some of the  
 181 Auckland populations (Hatfields Beach and Stanmore Bay with Browns Bay). However, population  
 182 structure between all other populations is strong, with a maximal  $F_{st}$  of 0.25 between Kaikōura and the  
 183 Māhia Peninsula. Unless otherwise indicated, all p-values are less than 0.0001.

|                      | Hatfields Beach 2015 | Stanmore Bay 2015 | Stanmore Bay 2018 | Browns Bay 2018 | Opito Bay 2018 | Mt Maunganui 2018 | Māhia Peninsula 2018 | Wellington 2018 |
|----------------------|----------------------|-------------------|-------------------|-----------------|----------------|-------------------|----------------------|-----------------|
| Stanmore Bay 2015    | 0<br>(p=0.65)        |                   |                   |                 |                |                   |                      |                 |
| Stanmore Bay 2018    | 0.001<br>(p=0.02)    | 0<br>(p=0.79)     |                   |                 |                |                   |                      |                 |
| Browns Bay 2018      | 0.002<br>(p=0.002)   | 0.002             | 0.002             |                 |                |                   |                      |                 |
| Opito Bay 2018       | 0.035                | 0.034             | 0.034             | 0.035           |                |                   |                      |                 |
| Mt Maunganui 2018    | 0.067                | 0.069             | 0.067             | 0.068           | 0.032          |                   |                      |                 |
| Māhia Peninsula 2018 | 0.092                | 0.090             | 0.091             | 0.091           | 0.070          | 0.063             |                      |                 |
| Wellington 2018      | 0.17                 | 0.17              | 0.24              | 0.17            | 0.19           | 0.22              | 0.18                 |                 |
| Kaikōura 2018        | 0.18                 | 0.18              | 0.19              | 0.18            | 0.20           | 0.23              | 0.25                 | 0.12            |

184

185 We next quantified population structure using principal component analysis, which identifies  
 186 the combinations of SNP loci that vary the most between individuals. We found that PC1  
 187 accounted for 19.5%, PC2 for 3.65%, and PC3 for 2.11% of the variance in SNP allele  
 188 frequency (**Figs. 2A** and **2B**). PC1 primarily delineated the southern Wellington and  
 189 Kaikōura populations from the other populations. PC2 primarily differentiated between the  
 190 northern populations, and revealed three potential cases of migration between Mt  
 191 Maunganui and the Māhia Peninsula (**Fig. 2A**). Finally, PC3 differentiated the southern  
 192 populations, Wellington and Kaikoura. All Auckland populations clustered together,  
 193 suggesting these individuals form one large population. We found no difference between the  
 194 temporal samples from Stanmore Bay, indicating that allele frequency variation over short  
 195 timescales is relatively stable.



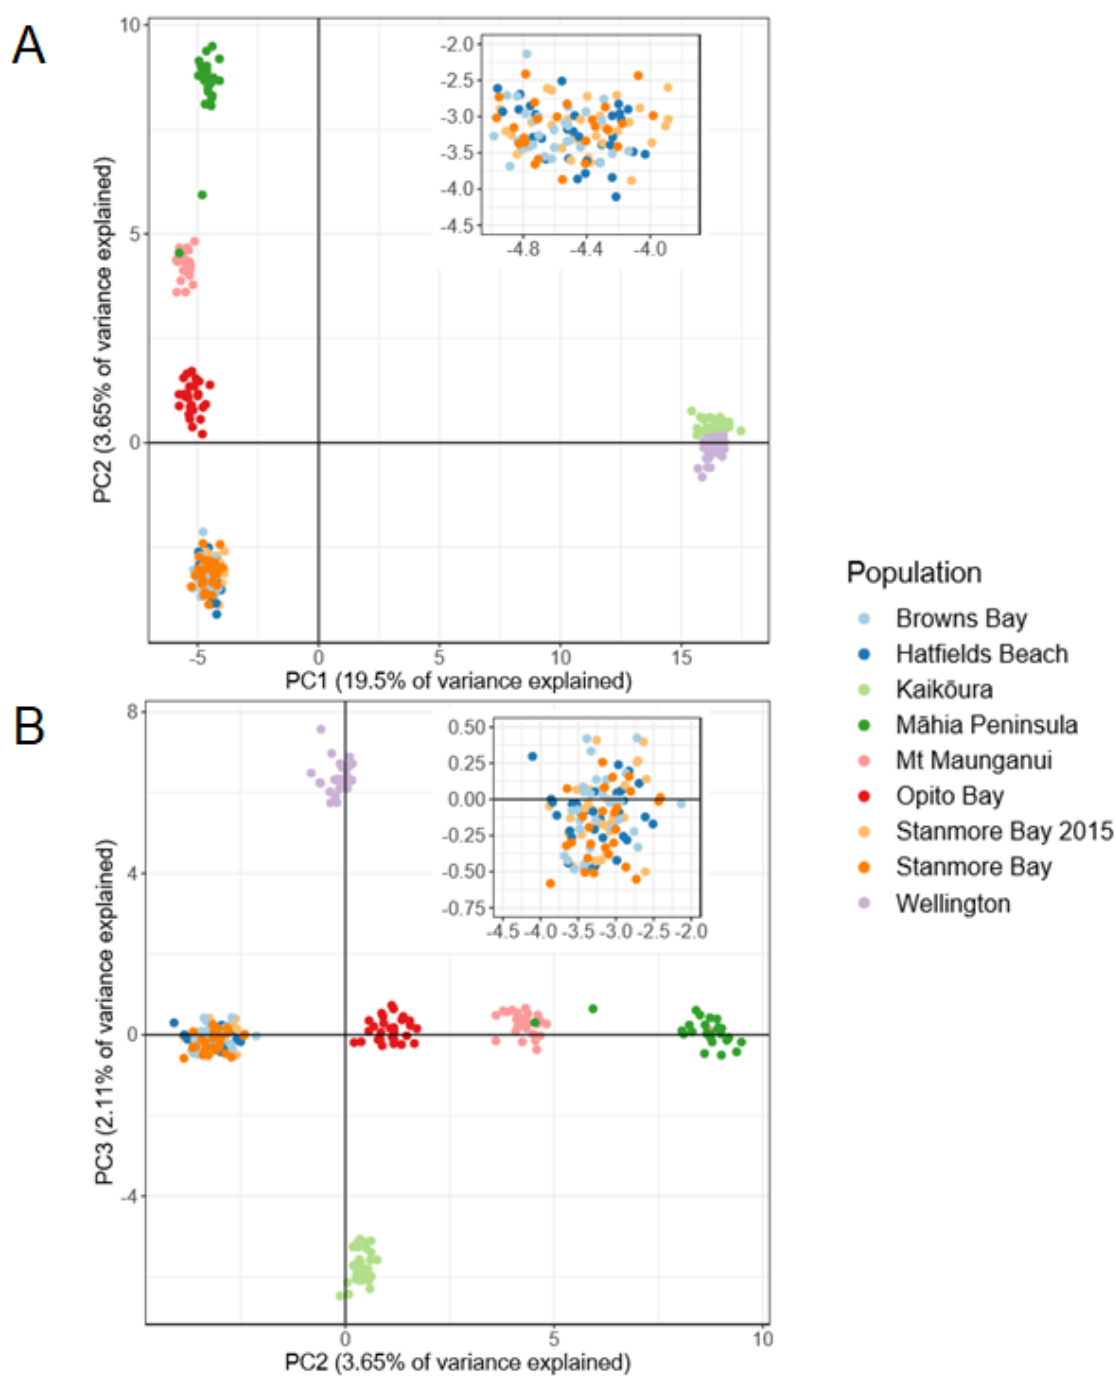

196

197 **Figure 2. Principal Component Analysis (PCA) indicates strong location-dependent**  
198 **population structure.** PC1 (19.5% of the variance) largely differentiates the individuals in  
199 southern populations from those in the northern populations (i.e. Wellington and Kaikōura  
200 from the rest). PC2 (3.65% of the variance) differentiates between the northern populations.  
201 Finally, PC3 differentiates the populations within the southern group. Insets show the  
202 Auckland populations, and indicate minimal evidence for structure within within them. Three  
203 potential recent migrant individual are apparent, two from the Māhia population (green  
204 points) to the Mt Maunganui population (pink points), and one from the Mt Maunganui  
205 population to the Māhia population, visible in panel (B) within the green points.  
206

207 A Procrustes transformation of the first two components of the PCA onto geographical space  
208 revealed that the spacing of each genetic cluster was strikingly concordant with the locations  
209 in geographical space, with the exception of Māhia and Wellington (**Fig. 3**).

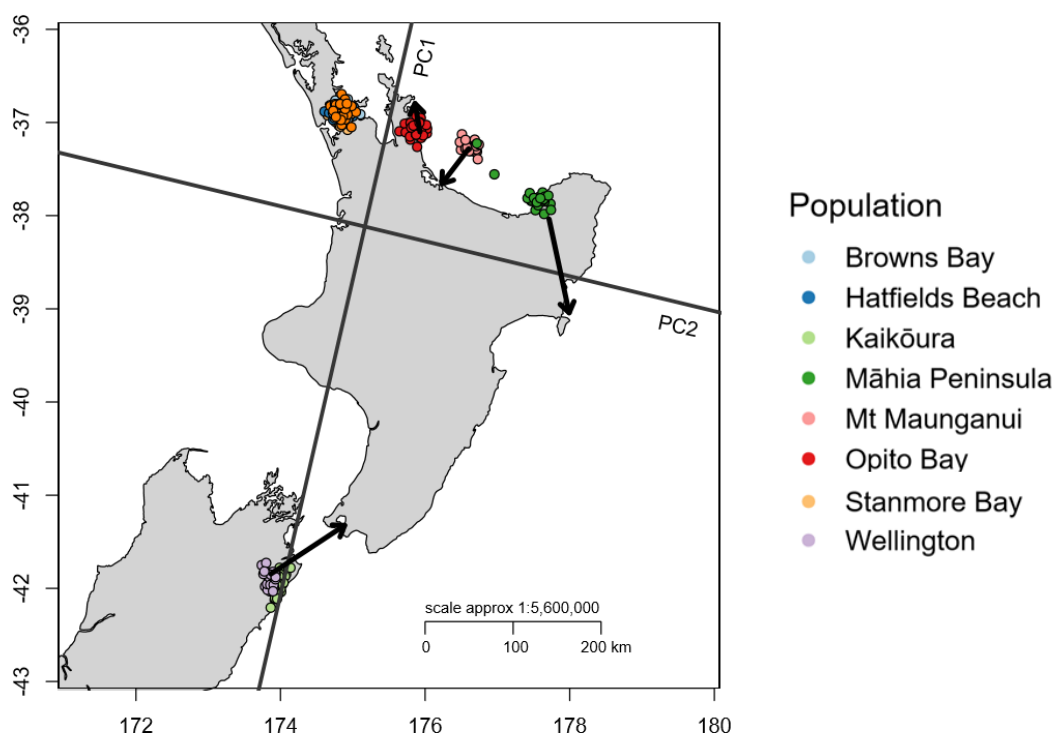

210 **Figure 1. Procrustes transformation of PC1 vs PC2 onto geographical coordinates.**  
211 The transformation indicates a strong correspondence between sampling location and  
212 genotype distance in principal component space. The arrows point to the location where a  
213 population is actually found, while clusters indicate their location in Procrustes-transformed  
214 space. The bottom arrow indicates the location of the Wellington population (purple) only.

215

216 As a complementary approach to the PCA in quantifying population structure, we  
217 implemented a STRUCTURE analysis. This method implements a model-based clustering  
218 approach, which probabilistically assigns individuals to one or more populations under an  
219 admixture model. The admixture model assigns different proportions of an individual's  
220 genome belonging to different ancestral populations (Pritchard et al., 2010). The  
221 STRUCTURE analyses showed similar results to the PCA, with all individuals from the  
222 Auckland locations consistently clustering together, while Kaikōura and Wellington also  
223 always clustered together across all ranges of K (**Fig. 4**). Again we observed no fine-grain  
224 structure within Auckland when sampling location was incorporated into the analysis  
225 (through use of the locprior model) (**Suppl. Fig. 3**).

226 As we increased K, additional population genetic structure (history) became apparent. When  
227 K=3, Māhia individuals formed a distinct cluster exhibiting high admixture with both Mt.  
228 Maunganui and Opito Bay. Increasing K further suggested genetic admixture between all  
229 adjacent populations with the exception of Wellington and Māhia. With K=4, there was clear  
230 evidence of two Māhia individuals with admixture profiles more similar to Mt. Maunganui  
231 individuals, and one Mt. Maunganui individual with a profile similar to Māhia individuals (Fig.  
232 5, bottom two individuals in the Māhia sample and top individual in the Maunganui sample,  
233 respectively). These correspond to the potential migrants identified in the PCA above.  
234 Unexpectedly, with K=5 and K=6, there was evidence of admixture between the  
235 northernmost populations (Auckland and Opito Bay) and the southernmost (Wellington and  
236 Kaikōura). However, this may be an artefact of overfitting (Evanno et al, 2005).

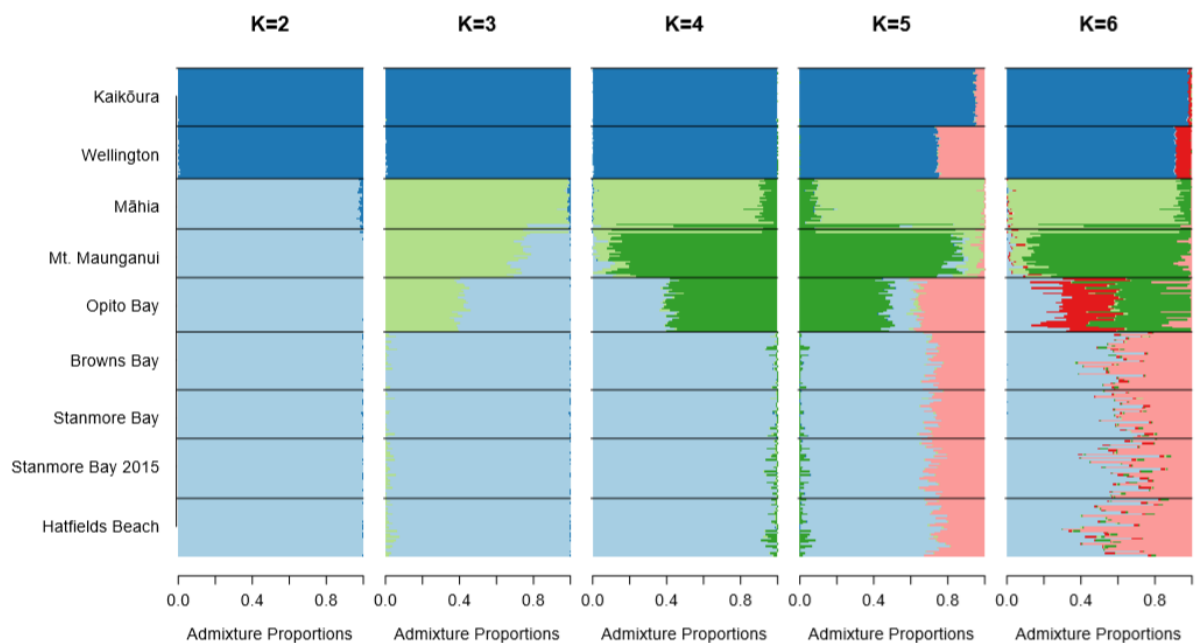

237

238 **Figure 4. Admixture plots based on Bayesian clustering analyses generated in**  
239 **STRUCTURE.** Each horizontal coloured line represents an individual from the locality  
240 sampled (indicated on the left). Horizontal black lines designate the junction between  
241 population samples. Results are based on 10 replicate runs for each K. At K=4 there are two  
242 individuals from Māhia with Mt. Maunganui-like admixture profiles (bottom two bars in the  
243 Māhia samples), and one individual from Mt. Maunganui with a Māhia-like admixture profile  
244 (top bar in the Mt. Maunganui samples).  
245

246 For all the analyses above ( $F_{st}$ , PCA, and STRUCTURE), there was clear evidence of  
247 population structure. In addition, the Procrustes transformation showed high correspondence  
248 between PCA distance and geographic distance (i.e. isolation-by-distance, IBD). In order to  
249 further confirm this, we used a Mantel test. This test showed a significant positive correlation  
250 between Slatkin's linearized  $F_{st}$  (used as a measure of population structure) and geographic

251 overwater distance ( $r = 0.83$ ,  $P = 0.001$ ; **Fig. 5**), again supporting IBD. This strong positive  
252 relationship remained even after excluding the southernmost populations (Kaikōura and  
253 Wellington) ( $r = 0.92$ ,  $P = 0.001$ ), indicating a pattern of IBD across several spatial scales.

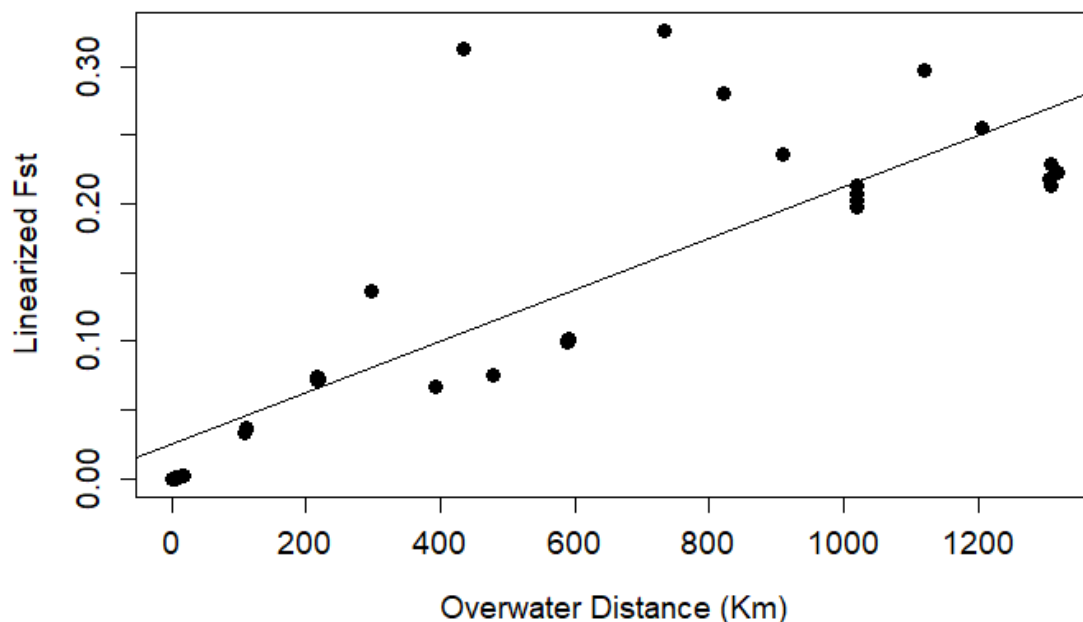

254

255 **Figure 5. The positive correlation between overwater distance and Slatkin's linearized**  
256  **$F_{st}$  suggests a pattern of population genetic structure due to isolation-by-distance.**  
257 The black line indicates the slope of relationship for just the contrasts between the northern  
258 populations (points in the lower left quadrant).

259

## 260 Discussion

261 Here we have quantified population structure in a direct-developing marine invertebrate  
262 across a wide range of spatial scales. By employing a GBS approach we aimed to increase  
263 our power to detect even low levels of population structure.

264 We found minimal evidence of population structure of *Isocladus armatus* within the Auckland  
265 region. Only the  $F_{st}$  analysis suggested that there is any population differentiation, between  
266 the Browns Bay and other Auckland populations. These are separated by approximately  
267 20km, which may be the smallest distance at which population genetic structure starts to  
268 occur in this species. Further resolution of this would require more fine-scaled spatial  
269 sampling in this region. These results, indicating low levels of population structure, are  
270 consistent with previous work in this species (Wells and Dale, 2018), as well as biphasically  
271 developing marine invertebrates in the Hauraki Gulf (offshore of the Auckland region), such  
272 as the native New Zealand sea urchin *Evechinus chloroticus* (Nagel et al., 2015) and the  
273 invasive tunicate *Styela clava* (Goldstien et al., 2010).

274 Over larger spatial scales, *I. armatus* exhibited strong patterns of isolation by distance (IBD).  
275 The Procrustes-transformed PCA indicated that PC1 and PC2 were highly concordant with  
276 the geographic arrangement of populations. To test the hypothesis of IBD more explicitly, we  
277 used a Mantel test, which indicated a strong and almost linear correlation between  
278 geographic distance and genetic distance, indicative of a stepping stone model of  
279 distribution.

280 We found evidence for unusually high admixture between Mt. Maunganui and Māhia  
281 Peninsula, despite their separation by a well-known biogeographic barrier, the East Cape.  
282 Perhaps the strongest evidence for this is the presence of three individuals that appeared to  
283 be recent migrants between these populations. In one of these an individual from Māhia  
284 population clustered with the Mt Maunganui in the PCA, while the opposite was the case for  
285 the second individual. The third individual was found located between the associated PC  
286 clusters. These three individuals also clustered with the other population, or were highly  
287 admixed, in the STRUCTURE analysis, supporting the migrant hypothesis. The individual  
288 with an intermediate genotype, as indicated by both the PCA and STRUCTURE analyses,  
289 argues against these results being due to sample contamination.

290 The biogeographic break at the East Cape has been shown to affect population structure in  
291 a range of species. This includes direct developers such as the anemone *Actinia tenebrosa*  
292 and two species of amphipods (Stevens & Hogg, 2004; Veale & Lavery, 2012). Even  
293 population structure in biphasic species with larval stages, such as the pua *Haliotis iris* (Will  
294 et al., 2011), and the marine gastropod *Buccinulum vittatum* (Gemmell et al., 2018), are  
295 affected by the East Cape. However, in contrast to these other direct developers, this break  
296 does not appear to strongly affect *Isocladus armatus*, as  $F_{st}$  between Mt. Maunganui and  
297 Māhia were no greater than the  $F_{st}$  between Mt. Maunganui and the Auckland area  
298 populations. In addition, the PCA showed the Mt. Maunganui population as almost exactly  
299 intermediate between the Māhia and Opito Bay populations, rather than being more closely  
300 allied with the Opito Bay population. Finally, the STRUCTURE analyses also showed  
301 admixture between Māhia and Maunganui across all values of K.

302 Instead of the expected north-south genetic break at the East Cape, we found a strong  
303 north-south break between Māhia and Wellington. This north-south break is congruent with  
304 the placement of a proposed biogeographic region border in this area (Shears et al., 2008)  
305 (**Fig. 1**). However, Shears et al. also proposed a biogeographic region border at East Cape,  
306 which is inconsistent with our study. Indeed, our study contrasts with two previously  
307 proposed hypotheses of strong genetic breaks associated with East Cape and the Cook  
308 Strait. Instead, we observe high gene flow over the East Cape, and genetic clustering of

309 Wellington and Kaikōura populations. Similar clustering of populations in these southern  
310 locations has been found for the anemone *Actinia tenebrosa* (Veale & Lavery, 2012).

311 One explanation for the strong genetic break may be the presence of cryptic species within *I.*  
312 *armatus*, which would drive gene flow to near-zero levels. Within New Zealand, strong north-  
313 south divergence between populations of the brooding brittle star, *Amphipolis squamata*, has  
314 been suggested to be the result of cryptic speciation (Sponer & Roy, 2002). Cryptic species  
315 have been frequently observed in isopods (Hurtado et al., 2016; Leese et al., 2008; Markow  
316 & Pfeiler, 2010), and the degree of genetic divergence between the northern and southern  
317 group in *I. armatus* is similar to that found between other cryptic species of isopods based on  
318 mitochondrial DNA (Leese et al., 2008). The potential for cryptic species is further supported  
319 by the observation of an individual from Browns Bay (which was excluded from all analyses)  
320 which, despite appearing morphologically similar to *I. armatus*, lacked 93% of SNPs that  
321 were present in other samples. While missing data is a common feature of reduced  
322 representation datasets, excessively high missingness in GBS data has been associated  
323 with divisions between species rather than populations (Tripp et al., 2017).

324

## 325 **Conclusion**

326 *Isocladus armatus* exhibits a surprisingly high amount of gene flow across small spatial  
327 scales. However at distances greater than 20 km the level of population structure is  
328 consistent with the expectation of reduced dispersal in direct developing species, and the  
329 presence of IBD. Interestingly, the strongest genetic break we observed was between the  
330 Māhia Peninsula and Wellington, with populations forming a clear northern and southern  
331 grouping either side of this break. This was unexpected, as other well-known biogeographic  
332 barriers – the East Cape and the Cook Strait – appeared to have little effect on population  
333 genetic structure. Additional fine-scale sampling across this genetic break would help in  
334 determining whether differentiation across this break is a result of the existence of cryptic  
335 species being present, or the result of a geophysical barrier that prevents dispersal in this  
336 region.

337 **References**

- 338 Amos, W. (2010). Even small SNP clusters are non-randomly distributed: Is this evidence of  
339 mutational non-independence? *Proc. Biol. Sci.*, 277(1686), 1443–1449.
- 340 Arranz Martinez, V. (2017). *Connectivity among marine communities: A multi-species*  
341 *approach to determining the major drivers of larval connection between populations*  
342 *of coastal species in New Zealand* [PhD Thesis].
- 343 Ayre, D. J., Minchinton, T. E., & Perrin, C. (2009). Does life history predict past and current  
344 connectivity for rocky intertidal invertebrates across a marine biogeographic barrier?  
345 *Mol. Ecol.*, 18(9), 1887–1903.
- 346 Baratti, M., Filippelli, M., & Messana, G. (2011). Complex genetic patterns in the mangrove  
347 wood-borer *Sphaeroma terebrans* Bate, 1866 (Isopoda, Crustacea, Sphaeromatidae)  
348 generated by shoreline topography and rafting dispersal. *J. Exp. Mar. Bio. Ecol.*,  
349 398(1–2), 73–82.
- 350 Beerli, P., & Felsenstein, J. (2001). Maximum likelihood estimation of a migration matrix and  
351 effective population sizes in n subpopulations by using a coalescent approach.  
352 *Proceedings of the National Academy of Sciences*, 98(8), 4563–4568.  
353 <https://doi.org/10.1073/pnas.081068098>
- 354 Cowen, R. K., & Sponaugle, S. (2009). Larval Dispersal and Marine Population Connectivity.  
355 *Annual Review of Marine Science*, 1(1), 443–466.  
356 <https://doi.org/10.1146/annurev.marine.010908.163757>
- 357 Dray, S., Dufour, A.-B., & Others. (2007). The ade4 package: Implementing the duality  
358 diagram for ecologists. *J. Stat. Softw.*, 22(4), 1–20.
- 359 Elshire, R. J., Glaubitz, J. C., Sun, Q., Poland, J. A., Kawamoto, K., Buckler, E. S., &  
360 Mitchell, S. E. (2011). A Robust, Simple Genotyping-by-Sequencing (GBS) Approach  
361 for High Diversity Species. *PLoS One*, 6(5), e19379.
- 362 Evanno, G., Regnaut, S., & Goudet, J. (2005) Detecting the number of clusters of individuals  
363 using the software structure: a simulation study. *Molecular Ecology*, 14(8), 2611-  
364 2620.
- 365 Excoffier, L., Smouse, P. E., & Quattro, J. M. (1992). Analysis of molecular variance inferred  
366 from metric distances among DNA haplotypes: Application to human mitochondrial  
367 DNA restriction data. *Genetics*, 131(2), 479–491.

- 368 Falush, D., Stephens, M., & Pritchard, J. K. (2003). Inference of population structure using  
369 multilocus genotype data: Linked loci and correlated allele frequencies. *Genetics*,  
370 164(4), 1567–1587.
- 371 Fraser, C. I., Morrison, A. K., Hogg, A. M., Macaya, E. C., van Seville, E., Ryan, P. G.,  
372 Padovan, A., Jack, C., Valdivia, N., & Waters, J. M. (2018). Antarctica's ecological  
373 isolation will be broken by storm-driven dispersal and warming. *Nat. Clim. Chang.*,  
374 8(8), 704–708. <https://doi.org/10.1038/s41558-018-0209-7>
- 375 Gemmell, M. R., Trewick, S. A., Crampton, J. S., Vaux, F., Hills, S. F. K., Daly, E. E.,  
376 Marshall, B. A., Beu, A. G., & Morgan-Richards, M. (2018). Genetic structure and  
377 shell shape variation within a rocky shore whelk suggest both diverging and  
378 constraining selection with gene flow. *Biol. J. Linn. Soc. Lond.*, 125(4), 827–843.
- 379 Goldstien, S. J., Schiel, D. R., & Gemmell, N. J. (2010). Regional connectivity and coastal  
380 expansion: Differentiating pre-border and post-border vectors for the invasive  
381 tunicate *Styela clava*. *Mol. Ecol.*, 19(5), 874–885.
- 382 González-Wevar, C. A., Segovia, N. I., Rosenfeld, S., Ojeda, J., Hüne, M., Naretto, J.,  
383 Saucède, T., Brickle, P., Morley, S., Féral, J.-P., Spencer, H. G., & Poulin, E. (2018).  
384 Unexpected absence of island endemics: Long-distance dispersal in higher latitude  
385 sub-Antarctic Siphonaria (Gastropoda: Euthyneura) species. *Journal of*  
386 *Biogeography*, 45(4), 874–884. <https://doi.org/10.1111/jbi.13174>
- 387 Gosselin, T. (2019). *thierrygosselin/radiator: Official release*.
- 388 Gruber, B., Unmack, P. J., Berry, O. F., & Georges, A. (2018). dartr: An r package to  
389 facilitate analysis of SNP data generated from reduced representation genome  
390 sequencing. *Mol. Ecol. Resour.*, 18(3), 691–699.
- 391 Hurley, D. E., & Jansen, K. P. (1977). The marine fauna of New Zealand: Family  
392 Sphaeromatidae (Crustacea Isopoda: Flabellifera). *N.Z. Oceanogr. Inst. Mem.*, 63,  
393 1–80.
- 394 Hurtado, L. A., Mateos, M., Mattos, G., Liu, S., Haye, P. A., & Paiva, P. C. (2016). Multiple  
395 transisthmian divergences, extensive cryptic diversity, occasional long-distance  
396 dispersal, and biogeographic patterns in a marine coastal isopod with an amphi-  
397 American distribution. *Ecology and Evolution*, 6(21), 7794–7808.  
398 <https://doi.org/10.1002/ece3.2397>
- 399 *INaturalist.org*. (n.d.). <https://www.inaturalist.org/>



- 400 Jakobsson, M., & Rosenberg, N. A. (2007). CLUMPP: a cluster matching and permutation  
401 program for dealing with label switching and multimodality in analysis of population  
402 structure. *Bioinformatics*, 23(14), 1801–1806.  
403 <https://doi.org/10.1093/bioinformatics/btm233>
- 404 Jombart, T., & Ahmed, I. (2011). adegenet 1.3-1: New tools for the analysis of genome-wide  
405 SNP data. *Bioinformatics*, 27(21), 3070–3071.
- 406 Kamvar, Z. N., Tabima, J. F., & Grünwald, N. J. (2014). Poppr: An R package for genetic  
407 analysis of populations with clonal, partially clonal, and/or sexual reproduction.  
408 *PeerJ*, 2, e281. <https://doi.org/10.7717/peerj.281>
- 409 Keightley, P. D., Ness, R. W., Halligan, D. L., & Haddrill, P. R. (2014). Estimation of the  
410 spontaneous mutation rate per nucleotide site in a *Drosophila melanogaster* full-sib  
411 family. *Genetics*, 196(1), 313–320.
- 412 Kilian, A., Wenzl, P., Huttner, E., Carling, J., Xia, L., Caig, V., Heller-uszynska, K., Jaccoud,  
413 D., Hopper, C., Aschenbrenner-kilian, M., Evers, M., Peng, K., Cayla, C., Hok, P., &  
414 Uzynski, G. (2012). Diversity Arrays Technology: A Generic Genome Profiling  
415 Technology on Open Platforms. In *Data Production and Analysis in Population*  
416 *Genomics* (Vol. 888, pp. 67–89).
- 417 Kimura, M., & Weiss, G. H. (1964). The Stepping Stone Model of Population Structure and  
418 the Decrease of Genetic Correlation with Distance. *Genetics*, 49(4), 561–576.
- 419 Leese, F., Kop, A., Wägele, J. W., & Held, C. (2008). Cryptic speciation in a benthic isopod  
420 from Patagonian and Falkland Island waters and the impact of glaciations on its  
421 population structure. *Front. Zool.*, 5, 1–15.
- 422 Markow, T. A., & Pfeiler, E. (2010). Mitochondrial DNA evidence for deep genetic  
423 divergences in allopatric populations of the rocky intertidal isopod *Ligia occidentalis*  
424 from the eastern Pacific. *Molecular Phylogenetics and Evolution*, 56(1), 468–473.  
425 <https://doi.org/10.1016/j.ympev.2009.12.002>
- 426 Martin, A., Quinn, K., & Park, J. H. (2011). MCMCpack: Markov Chain Monte Carlo in R.  
427 *Journal of Statistical Software, Articles*, 42(9), 1–21.
- 428 McGaughan, A., Hogg, I. D., Stevens, M. I., Lindsay Chadderton, W., & Winterbourn, M. J.  
429 (2006). Genetic divergence of three freshwater isopod species from southern New  
430 Zealand. *J. Biogeogr.*, 33(1), 23–30.

- 431 McMillan, W. O., Raff, R. A., & Palumbi, S. R. (1992). Population Genetic Consequences of  
432 Developmental Evolution in Sea Urchins (genus *Heliocidaris*). *Evolution*, *46*(5),  
433 1299–1312. <https://doi.org/10.1111/j.1558-5646.1992.tb01125.x>
- 434 Mussmann, S. M., Douglas, M. R., Chafin, T. K., & Douglas, M. E. (2019). BA3-SNPs:  
435 Contemporary migration reconfigured in BayesAss for next-generation sequence  
436 data. *Methods Ecol. Evol.*, *202*, 389.
- 437 Nagel, M. M., Sewell, M. A., & Lavery, S. D. (2015). Differences in population connectivity of  
438 a benthic marine invertebrate *Evechinus chloroticus* (Echinodermata: Echinoidea)  
439 across large and small spatial scales. *Conserv. Genet.*, *16*(4), 965–978.  
440 <https://doi.org/10.1007/s10592-015-0716-2>
- 441 Oksanen, J., Blanchet, F. G., Kindt, R., Legendre, P., O'hara, R. B., Simpson, G. L.,  
442 Solymos, P., Stevens, M. H. H., & Wagner, H. (2010). Vegan: Community ecology  
443 package. R package version 1.17-4. [Http://Cran.r-Project.Org](http://Cran.r-Project.Org)>. *Acesso Em*, *23*,  
444 2010.
- 445 Pante, E., & Simon-Bouhet, B. (2013). marmap: A package for importing, plotting and  
446 analyzing bathymetric and topographic data in R. *PLoS One*, *8*(9), e73051.
- 447 Pelc, R. A., Warner, R. R., & Gaines, S. D. (2009). Geographical patterns of genetic  
448 structure in marine species with contrasting life histories. *J. Biogeogr.*, *36*(10), 1881–  
449 1890.
- 450 Pembleton, L. W., Cogan, N. O. I., & Forster, J. W. (2013). StAMPP: an R package for  
451 calculation of genetic differentiation and structure of mixed-ploidy level populations.  
452 *Mol. Ecol. Resour.*, *13*(5), 946–952.
- 453 Pritchard, J. K., Wen, W., & Falush, D. (2010). *Documentation for STRUCTURE software:*  
454 *Version 2.3.*  
455 [http://citeseerx.ist.psu.edu/viewdoc/download?doi=10.1.1.323.9675&rep=rep1&type=](http://citeseerx.ist.psu.edu/viewdoc/download?doi=10.1.1.323.9675&rep=rep1&type=pdf)  
456 [pdf](http://citeseerx.ist.psu.edu/viewdoc/download?doi=10.1.1.323.9675&rep=rep1&type=pdf)
- 457 Puebla, O., Bermingham, E., & Guichard, F. (2009). Estimating dispersal from genetic  
458 isolation by distance in a coral reef fish (*Hypoplectrus puella*). *Ecology*, *90*(11),  
459 3087–3098.
- 460 Puritz, J. B., Keever, C. C., Addison, J. A., Barbosa, S. S., Byrne, M., Hart, M. W., Grosberg,  
461 R. K., & Toonen, R. J. (2017). Life-history predicts past and present population  
462 connectivity in two sympatric sea stars. *Ecol. Evol.*, *7*(11), 3916–3930.

- 463 Rousset, F. (1997). Genetic differentiation and estimation of gene flow from F-statistics  
464 under isolation by distance. *Genetics*, 145(4), 1219–1228.
- 465 Santamaria, C. A., Mateos, M., & Hurtado, L. A. (2014). Diversification at the narrow sea-  
466 land interface in the Caribbean: Phylogeography of endemic supralittoral Ligia  
467 isopods. *Frontiers in Ecology and Evolution*, 2.  
468 <https://doi.org/10.3389/fevo.2014.00042>
- 469 Shanks, A. L. (2009). Pelagic larval duration and dispersal distance revisited. *The Biological*  
470 *Bulletin*, 216(3), 373–385. <https://doi.org/10.1086/BBLv216n3p373>
- 471 Shears, N. T., Smith, F., Babcock, R. C., Duffy, C. A. J., & Villouta, E. (2008). Evaluation of  
472 biogeographic classification schemes for conservation planning: Application to New  
473 Zealand's coastal marine environment. *Conserv. Biol.*, 22(2), 467–481.
- 474 Simpson, S. D., Harrison, H. B., Claereboudt, M. R., & Planes, S. (2014). Long-Distance  
475 Dispersal via Ocean Currents Connects Omani Clownfish Populations throughout  
476 Entire Species Range. *PLOS ONE*, 9(9), e107610.  
477 <https://doi.org/10.1371/journal.pone.0107610>
- 478 Smouse, P. E., Long, J. C., & Sokal, R. R. (1986). Multiple Regression and Correlation  
479 Extensions of the Mantel Test of Matrix Correspondence. *Systematic Zoology*, 35(4),  
480 627–632. JSTOR. <https://doi.org/10.2307/2413122>
- 481 Sponer, R., & Roy, M. S. (2002). Phylogeographic analysis of the brooding brittle star  
482 *Amphipholis squamata* (Echinodermata) along the coast of New Zealand reveals  
483 high cryptic genetic variation. *Evolution*, 56(10), 1954–1967.
- 484 Stevens, M. I., & Hogg, I. D. (2004). Population genetic structure of New Zealand's endemic  
485 corophiid amphipods: Evidence for allopatric speciation. *Biol. J. Linn. Soc. Lond.*,  
486 81(1), 119–133.
- 487 Temunović, M., Franjić, J., Satovic, Z., Grgurev, M., Frascaria-Lacoste, N., & Fernández-  
488 Manjarrés, J. F. (2012). Environmental heterogeneity explains the genetic structure  
489 of Continental and Mediterranean populations of *Fraxinus angustifolia* Vahl. *PLoS*  
490 *One*, 7(8), e42764.
- 491 Teske, P., Papadopoulos, I., Zardi, G., McQuaid, C., Edkins, M., Griffiths, C., & Barker, N.  
492 (2007). Implications of life history for genetic structure and migration rates of  
493 southern African coastal invertebrates: Planktonic, abbreviated and direct  
494 development. *Mar. Biol.*, 152(3), 697–711.

- 495 Tripp, E. A., Tsai, Y.-H. E., Zhuang, Y., & Dexter, K. G. (2017). RADseq dataset with 90%  
496 missing data fully resolves recent radiation of *Petalidium* (Acanthaceae) in the ultra-  
497 arid deserts of Namibia. *Ecol. Evol.*, 7(19), 7920–7936.
- 498 Underwood, J. N., Travers, M. J., & Gilmour, J. P. (2012). Subtle genetic structure reveals  
499 restricted connectivity among populations of a coral reef fish inhabiting remote atolls.  
500 *Ecology and Evolution*, 2(3), 666–679. <https://doi.org/10.1002/ece3.80>
- 501 Van Wyngaarden, M., Snelgrove, P. V. R., DiBacco, C., Hamilton, L. C., Rodríguez-  
502 Ezpeleta, N., Jeffery, N. W., Stanley, R. R. E., & Bradbury, I. R. (2017). Identifying  
503 patterns of dispersal, connectivity and selection in the sea scallop, *Placopecten*  
504 *magellanicus*, using RADseq-derived SNPs. *Evol. Appl.*, 10(1), 102–117.
- 505 Vavrek, M. J. (2011). Fossil: Palaeoecological and palaeogeographical analysis tools.  
506 *Palaeontol. Electronica*, 14(1), 16.
- 507 Veale, A. J., & Lavery, S. D. (2012). The population genetic structure of the waratah  
508 anemone ( *Actinia tenebrosa* ) around New Zealand. *N. Z. J. Mar. Freshwater Res.*,  
509 46(4), 523–536.
- 510 Verity, R., & Nichols, R. A. (2016). Estimating the Number of Subpopulations (K) in  
511 Structured Populations. *Genetics*, 203(4), 1827–1839.
- 512 Waples, R. S. (1987). A Multispecies Approach to the Analysis of Gene Flow in Marine  
513 Shore Fishes. *Evolution*, 41(2), 385–400. JSTOR. <https://doi.org/10.2307/2409146>
- 514 Wells, S. J., & Dale, J. (2018). Contrasting gene flow at different spatial scales revealed by  
515 genotyping-by-sequencing in *Isocladus armatus*, a massively colour polymorphic  
516 New Zealand marine isopod. *PeerJ*, 6, e5462. <https://doi.org/10.7717/peerj.5462>
- 517 Whitlock, M. C. (2011). And D do not replace FST. *Mol. Ecol.*, 20(6), 1083–1091.
- 518 Will, M., Hale, M. L., Schiel, D. R., & Gemmell, N. J. (2011). Low to moderate levels of  
519 genetic differentiation detected across the distribution of the New Zealand abalone,  
520 *Haliotis iris*. *Mar. Biol.*, 158(6), 1417–1429.
- 521 Wilson, G. A., & Rannala, B. (2003). Bayesian inference of recent migration rates using  
522 multilocus genotypes. *Genetics*, 163(3), 1177–1191.
- 523 Winston, J. E. (2012). Dispersal in marine organisms without a pelagic larval phase.  
524 *Integrative and Comparative Biology*, 52(4), 447–457.  
525 <https://doi.org/10.1093/icb/ics040>
- 526 Yoshino, H., Yamaji, F., & Ohsawa, T. A. (2018). Genetic structure and dispersal patterns in  
527 *Limnoria nagatai* (Limnoriidae, Isopoda) dwelling in non-buoyant kelps, *Eisenia*

528 bicyclis and *E. arborea*, in Japan. *PLOS ONE*, 13(6), e0198451.  
529 <https://doi.org/10.1371/journal.pone.0198451>
